# Supplementary material for: Deterioration in hygiene behavior among fifth-year medical students during the placement of intravenous catheters: a prospective cohort comparison of practical skills
Source: PubMed Central journal article supplement (PMC8369648; doi:10.1186/s12909-021-02868-5), 2021-08-17
Supplement: 12909_2021_2868_MOESM2_ESM.pdf [file 12909_2021_2868_MOESM2_ESM.pdf]

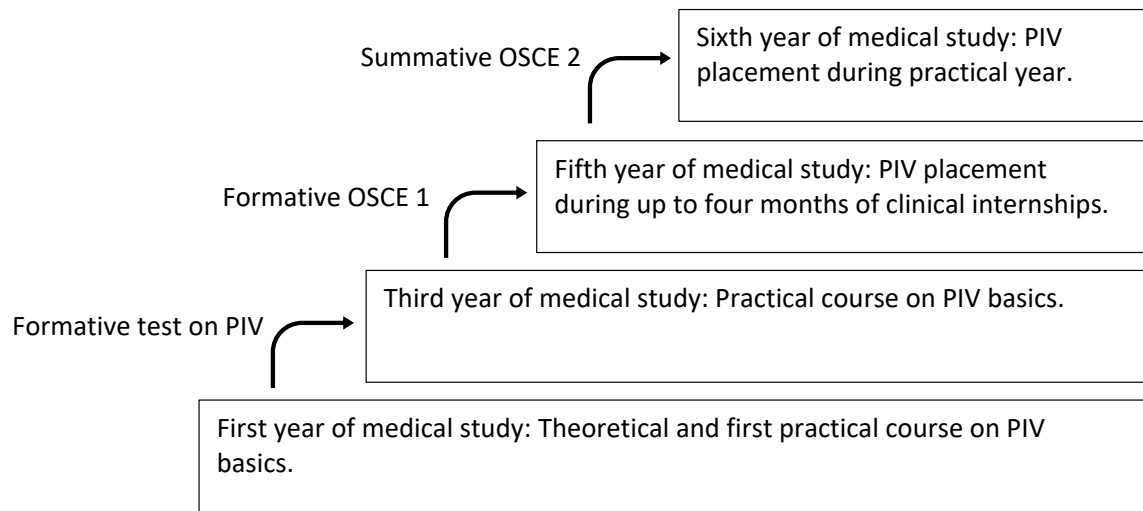

**Appendix 2: Chronological overview of the courses and examinations on PIV taken by study participants.**
